# Supplementary material
Source: Research Square preprint supplement (doi:10.21203/rs.3.rs-9897374/v1)

## Unprocessed original images for SDS-PAGE

Original SDS-PAGE related to Figure 2B

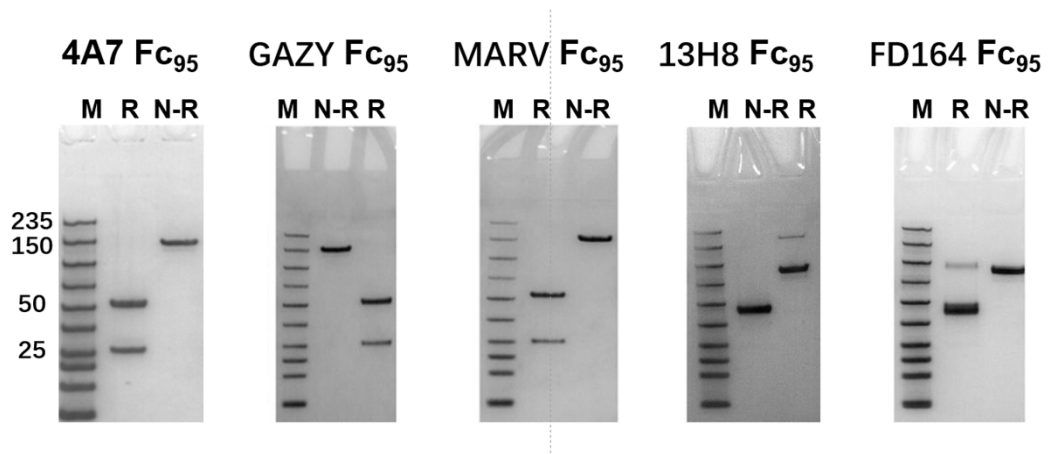

Original SDS-PAGE related to Figure S2A

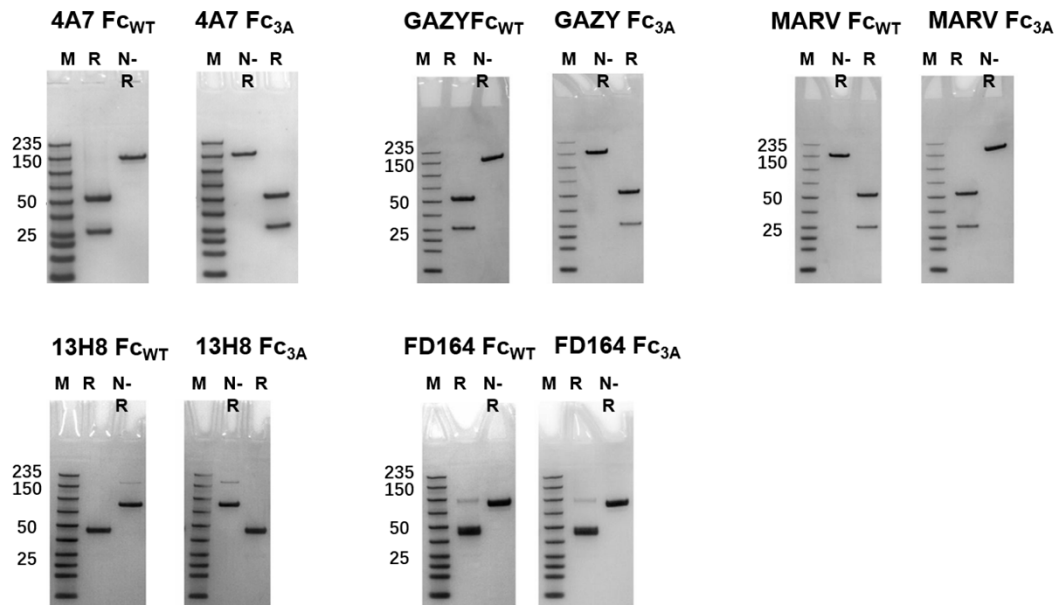

# Unprocessed original images for Immunohistochemistry

## Original immunofluorescence related to Figure 6D

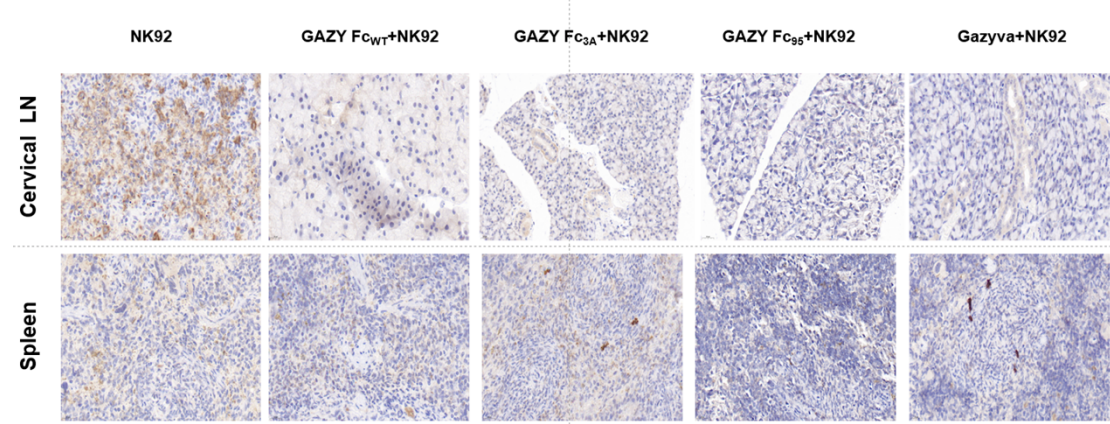

## Unprocessed original images for Immunofluorescence

Original immunofluorescence related to Figure 6H

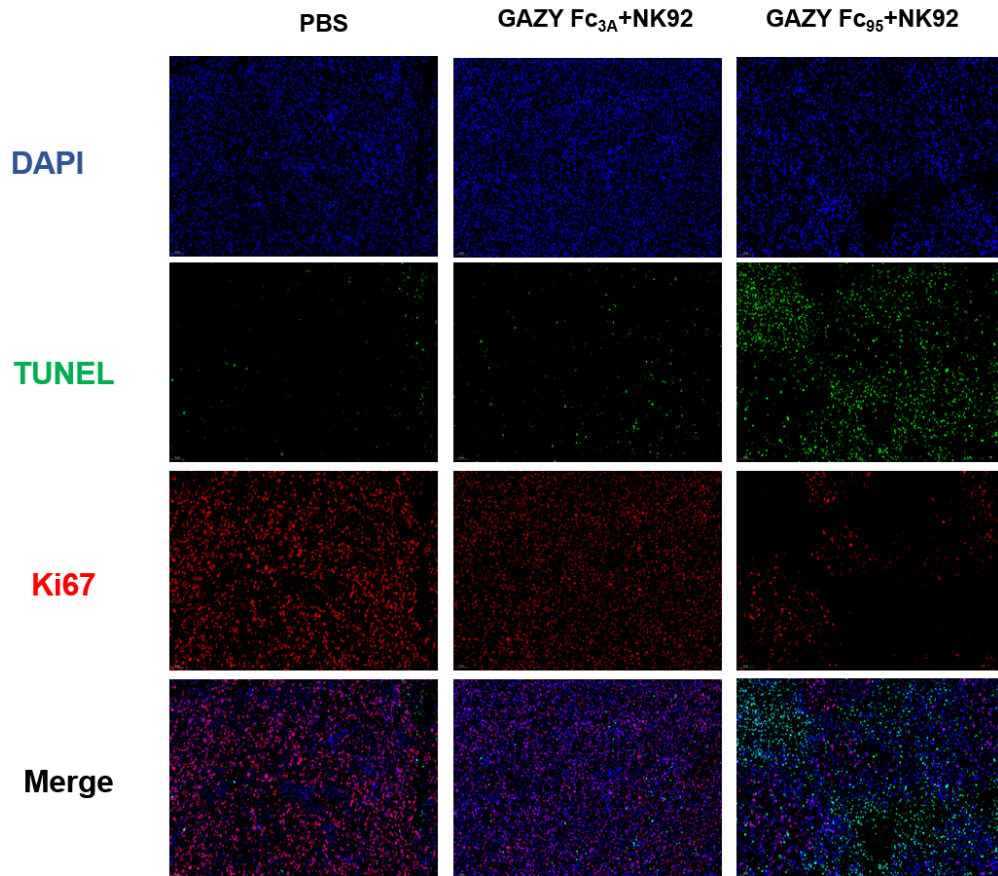

Original immunofluorescence related to Figure S6E

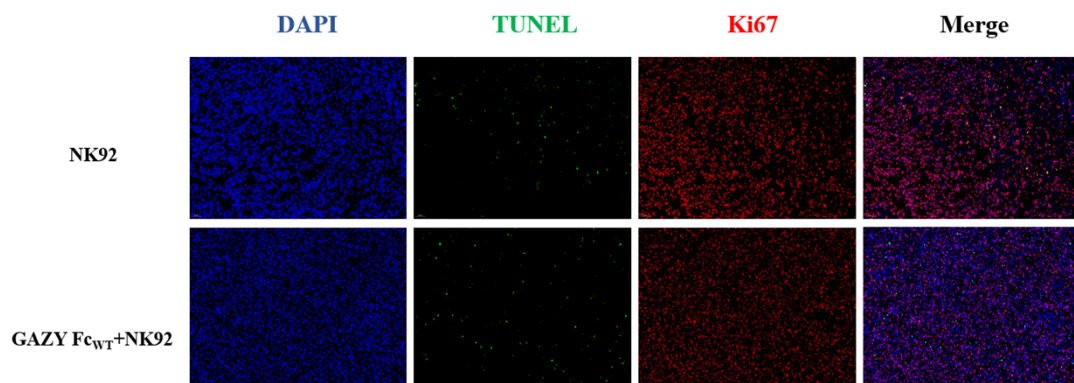

Original immunofluorescence related to Figure 6I and Figure S6F

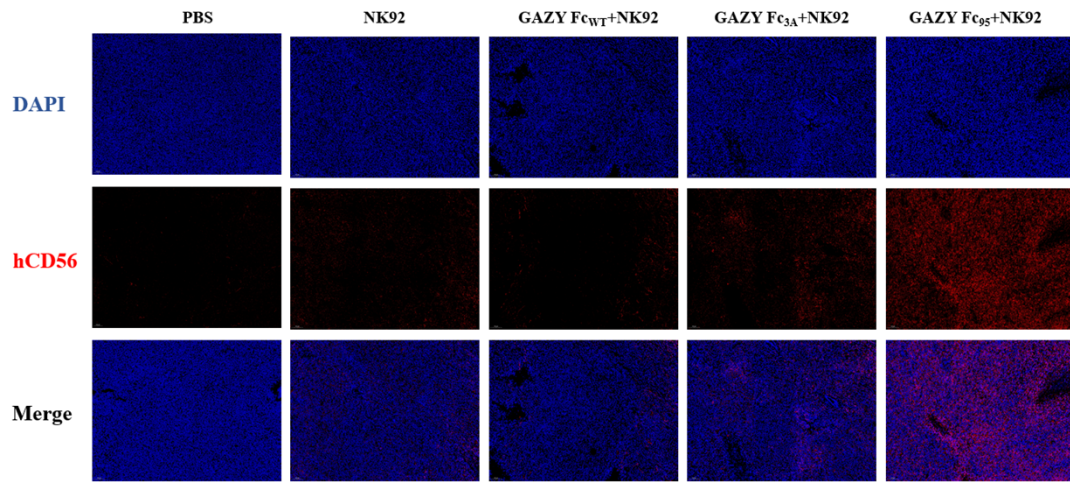

Original immunofluorescence related to Figure S6I

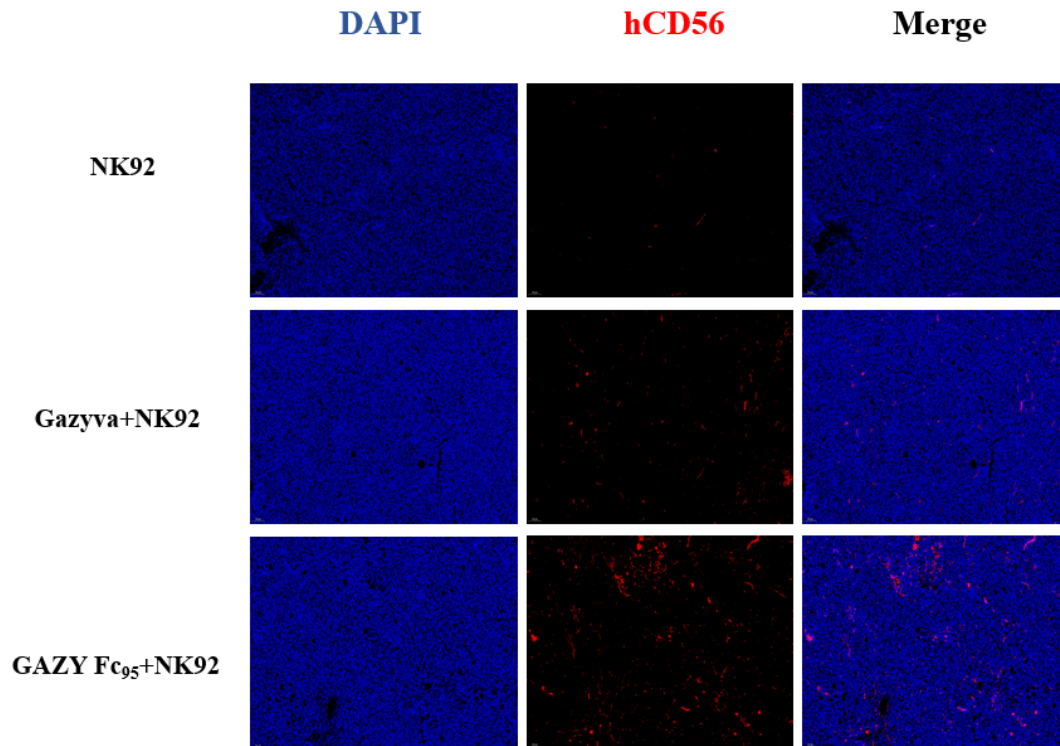

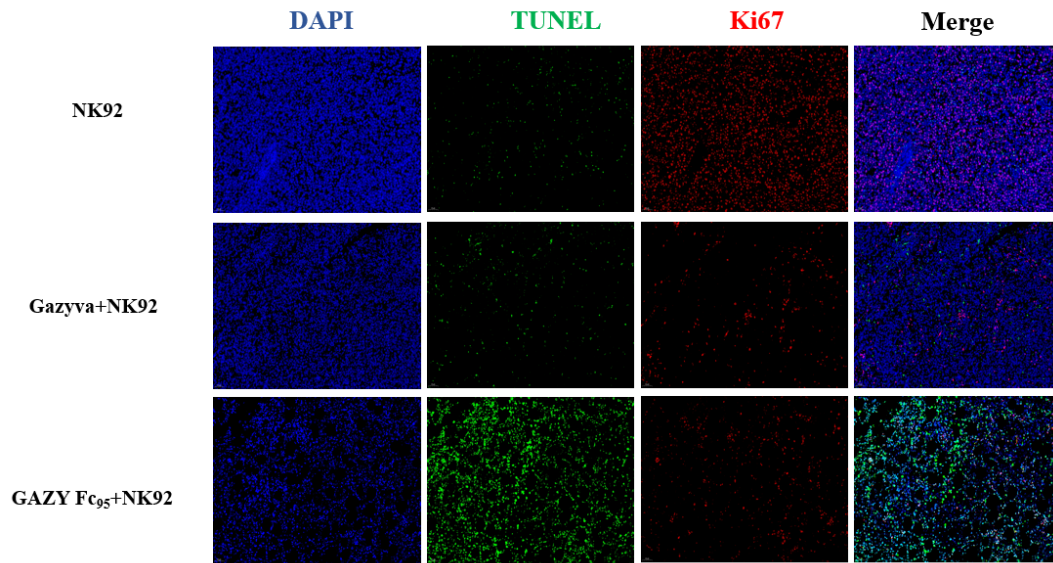

Original immunofluorescence related to Figure 7G

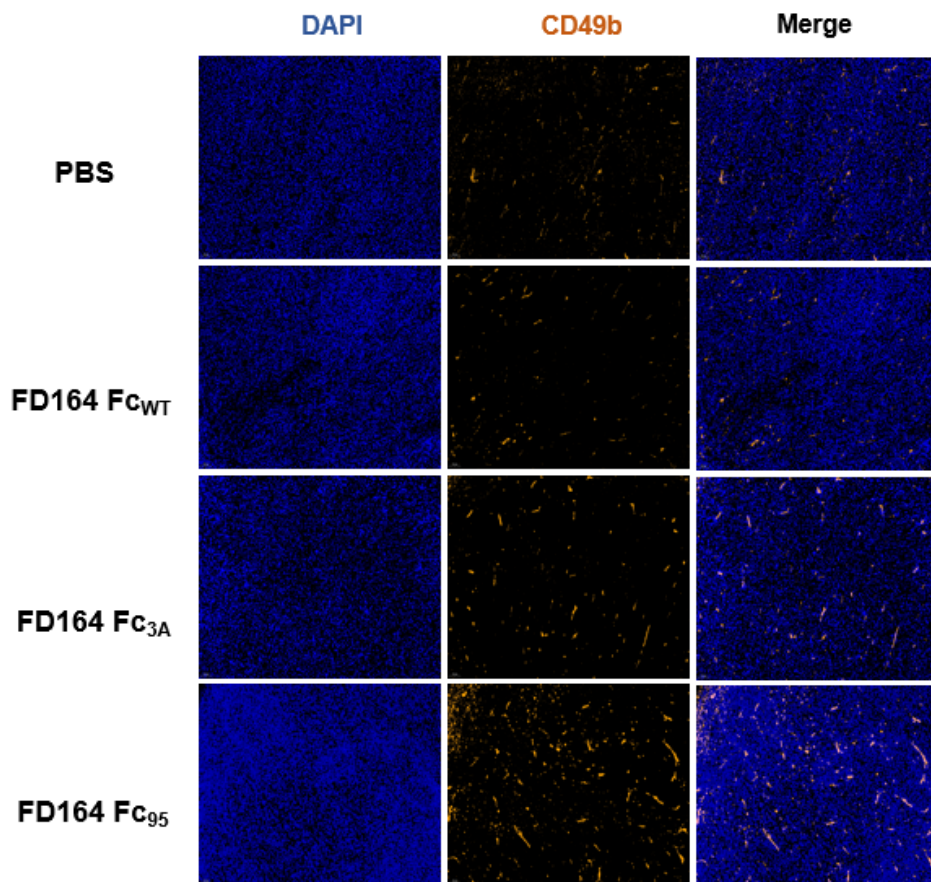

Original immunofluorescence related to Figure 7H

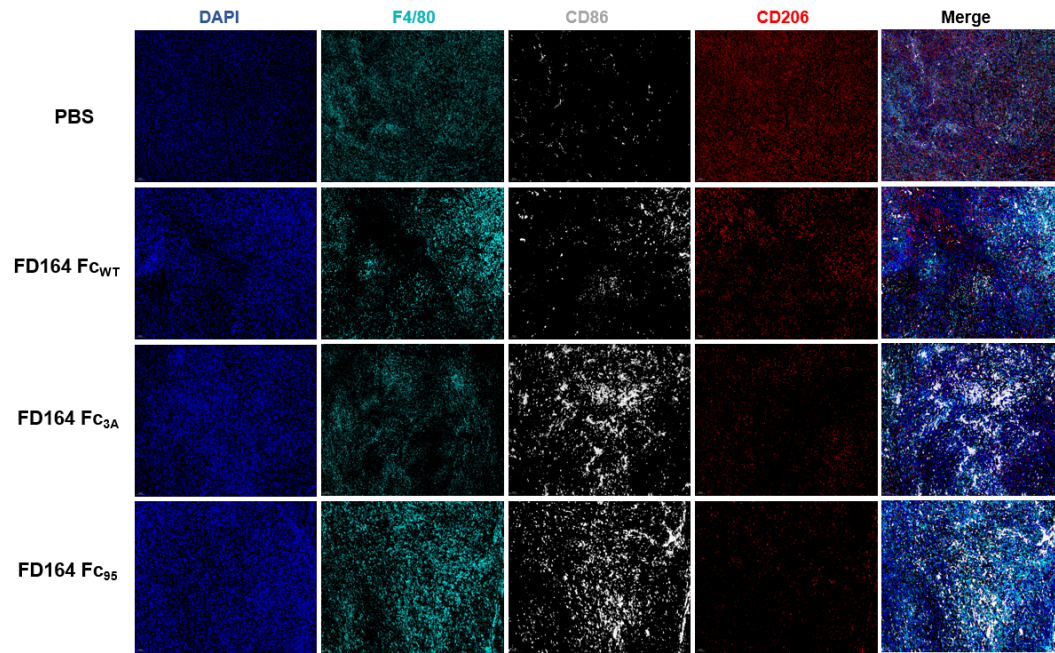

Original immunofluorescence related to Figure 7I

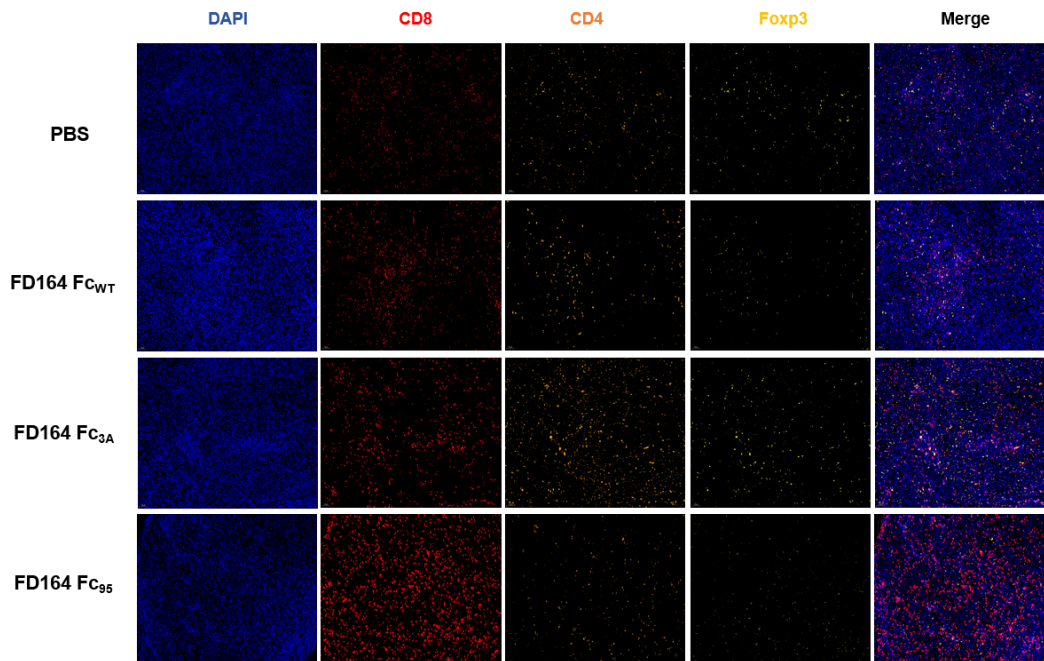

Original immunofluorescence related to Figure S7N

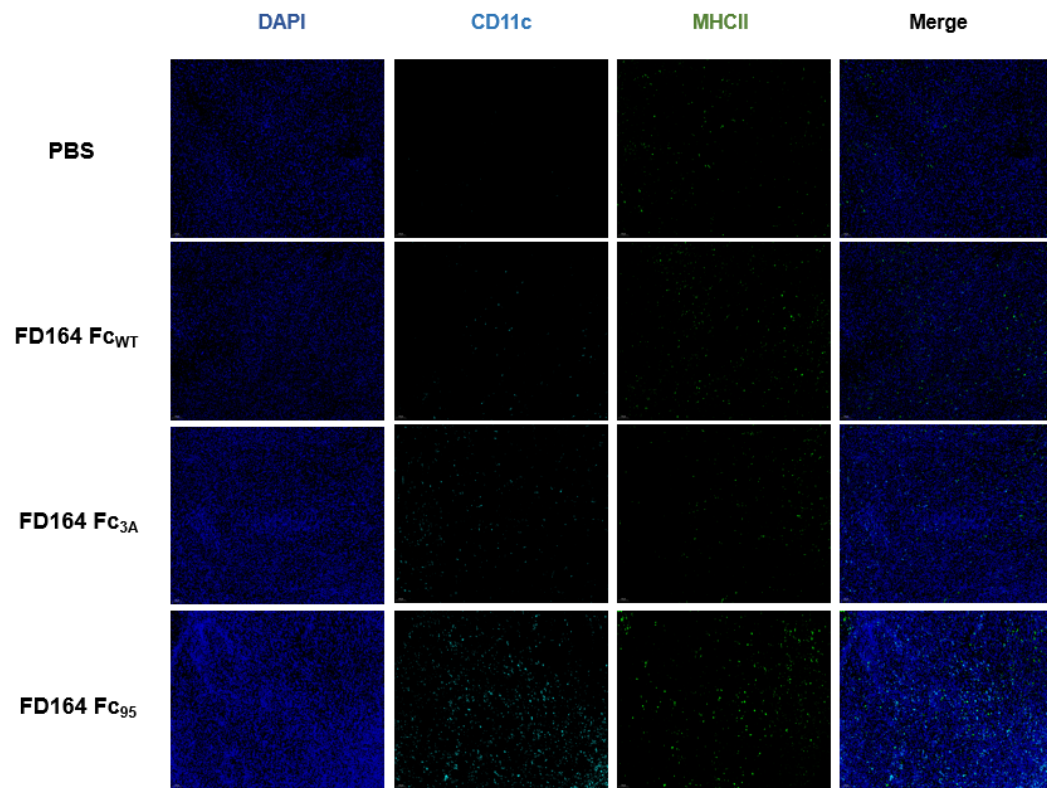

Original HE related to Figure 8E

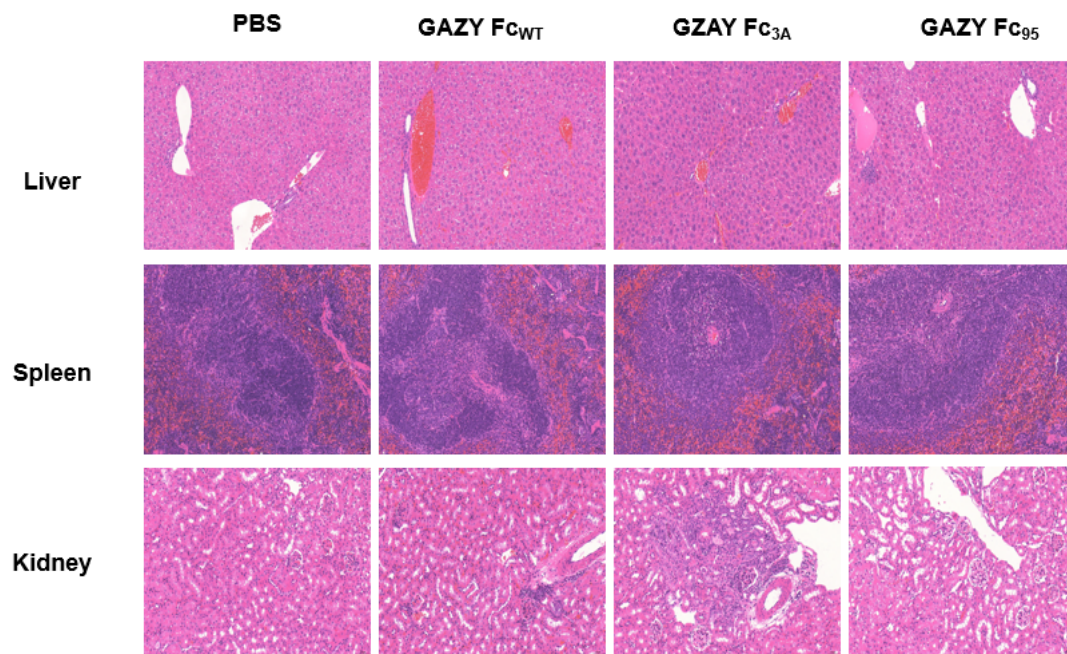

Supplement: Supplementary file 2 [file 8f426c345f3d9de06213ca91.pdf]
