# Supplementary material
Source: Research Square preprint supplement (doi:10.21203/rs.3.rs-9897374/v1)
Supplement: Supplementary file 1 [file 5d17b5fe22e83b0167d77df1.pdf]

**Table S1. Expression yields and purification summary for all 15 antibodies**

| Samples                | Targets                                   | Total expression amount (mg/L) | Concentration (mg/mL) |
|------------------------|-------------------------------------------|--------------------------------|-----------------------|
| 4A7 Fc <sub>WT</sub>   | Claudin 18.2                              | 118.6                          | 3.56                  |
| 4A7 Fc <sub>3A</sub>   |                                           | 240.0                          | 11.24                 |
| 4A7 Fc <sub>95</sub>   |                                           | 962.2                          | 7.76                  |
| GAZY Fc <sub>WT</sub>  | CD20                                      | 396.3                          | 3.17                  |
| GAZY Fc <sub>3A</sub>  |                                           | 368.0                          | 3.20                  |
| GAZY Fc <sub>95</sub>  |                                           | 334.7                          | 2.91                  |
| MARV Fc <sub>WT</sub>  | Marburg G<br>Protein                      | 438.8                          | 3.10                  |
| MARV Fc <sub>3A</sub>  |                                           | 363.0                          | 3.51                  |
| MARV Fc <sub>95</sub>  |                                           | 353.4                          | 3.30                  |
| 13H8 Fc <sub>WT</sub>  | Influenza<br>hemagglutinin<br>stem (H1N1) | 438.6                          | 2.46                  |
| 13H8 Fc <sub>3A</sub>  |                                           | 527.6                          | 3.38                  |
| 13H8 Fc <sub>95</sub>  |                                           | 475.9                          | 2.95                  |
| FD164 Fc <sub>WT</sub> | CD47                                      | 624.1                          | 4.09                  |
| FD164 Fc <sub>3A</sub> |                                           | 742.3                          | 4.03                  |
| FD164 Fc <sub>95</sub> |                                           | 679.0                          | 4.56                  |

**Table S2**

| <b>KD for FcγR of Fc variants</b> |                                                  |                                                  |                                 |                                 |                               |                               |
|-----------------------------------|--------------------------------------------------|--------------------------------------------------|---------------------------------|---------------------------------|-------------------------------|-------------------------------|
| Fc variants                       | $K_D$ for<br>FcγRIIIa <sup>158V</sup><br>(mol/L) | $K_D$ for<br>FcγRIIIa <sup>158F</sup><br>(mol/L) | $K_D$ for<br>FcγRIIa<br>(mol/L) | $K_D$ for<br>FcγRIIb<br>(mol/L) | $K_D$ for<br>FcγRI<br>(mol/L) | $K_D$ for<br>hFcRn<br>(mol/L) |
| 4A7 Fc <sub>WT</sub>              | 7.890E-08                                        | 1.763E-07                                        | 1.926E-09                       | 3.907E-06                       | 4.398E-11                     | 2.3E-08                       |
| 4A7 Fc <sub>3A</sub>              | 1.202E-08                                        | 1.122E-07                                        | 5.558E-09                       | 2.719E-06                       | 3.960E-11                     | 2.3E-08                       |
| 4A7 Fc <sub>95</sub>              | 2.692E-09                                        | 7.762E-09                                        | 3.991E-09                       | 3.676E-06                       | 1.000E-12                     | 2.5E-08                       |
| GAZY Fc <sub>WT</sub>             | 6.164E-08                                        | 1.441E-07                                        | 7.065E-07                       | 2.200E-06                       | 1.444E-10                     | 2.3E-08                       |
| GAZY Fc <sub>3A</sub>             | 1.172E-08                                        | 3.852E-08                                        | 1.087E-06                       | 2.493E-06                       | 1.498E-10                     | 1.5E-08                       |
| GAZY Fc <sub>95</sub>             | 1.254E-09                                        | 2.723E-09                                        | 5.636E-07                       | 1.314E-06                       | 8.569E-11                     | 1.4E-08                       |
| MARV Fc <sub>WT</sub>             | 7.915E-08                                        | 6.122E-08                                        | 1.956E-07                       | 9.681E-07                       | 3.771E-11                     | 2.0E-08                       |
| MARV Fc <sub>3A</sub>             | 6.737E-09                                        | 1.632E-08                                        | 1.745E-07                       | 1.286E-06                       | 5.204E-11                     | 1.6E-08                       |
| MARV Fc <sub>95</sub>             | 7.572E-10                                        | 2.009E-09                                        | 8.651E-08                       | 5.674E-06                       | 9.080E-12                     | 2.2E-08                       |
| 13H8 Fc <sub>WT</sub>             | 6.547E-07                                        | 1.145E-06                                        | 2.828E-07                       | 6.285E-07                       | 7.622E-10                     | 6.6E-08                       |
| 13H8 Fc <sub>3A</sub>             | 1.347E-08                                        | 1.359E-08                                        | 7.041E-07                       | 3.985E-07                       | 5.512E-10                     | 1.4E-07                       |
| 13H8 Fc <sub>95</sub>             | 3.700E-09                                        | 6.009E-09                                        | 3.928E-07                       | 1.526E-07                       | 3.718E-10                     | 2.3E-07                       |
| FD164 Fc <sub>WT</sub>            | 1.838E-08                                        | 1.525E-08                                        | 9.992E-07                       | 1.581E-06                       | 1.056E-09                     | 1.4E-06                       |
| FD164 Fc <sub>3A</sub>            | 1.064E-08                                        | 1.024E-08                                        | 5.524E-05                       | 1.336E-06                       | 1.004E-09                     | 2.9E-06                       |
| FD164 Fc <sub>95</sub>            | 2.256E-09                                        | 4.052E-09                                        | 1.279E-06                       | 5.377E-06                       | 9.153E-10                     | 3.0E-06                       |
| Gazyva                            | 8.146E-09                                        | 7.536E-09                                        | 4.668E-07                       | 9.606E-07                       | 5.771E-10                     | 1.5E-07                       |
| MARV Fc <sub>LZ01</sub>           | 1.395E-08                                        | 4.817E-08                                        | 8.017E-08                       | 2.688E-06                       | 2.039E-10                     | 1.5E-08                       |

**Table S3. Quantitative histopathological scores of organ lesions.**

Tissues (liver, spleen, kidney) were collected from mice at the study endpoint (as described in Figure 8D), fixed in 10% neutral buffered formalin, and embedded in paraffin. Sections were stained with Hematoxylin and Eosin (H&E) for histopathological evaluation. A board-certified pathologist, who was blinded to the experimental groups, performed the scoring.

**Scoring Criteria:**

| Score | Grade          | Pathological Description                                              | Tissue Area Affected |
|-------|----------------|-----------------------------------------------------------------------|----------------------|
| 0     | Normal         | No observable pathological changes.                                   | N/A                  |
| 1     | Minimal (+)    | Focal and minimal inflammatory cell infiltration.                     | <5%                  |
| 2     | Mild (++)      | Multifocal inflammation and occasional necrosis.                      | 5–25%                |
| 3     | Moderate (+++) | Diffuse, significant inflammatory damage with noticeable necrosis.    | 25–50%               |
| 4     | Severe (++++)  | Extensive damage with confluent necrosis or architectural distortion. | >50%                 |

**Table Content:** The table displays the individual scores for each animal (n=3 per group).

| Liver                 |                      |                                |            |
|-----------------------|----------------------|--------------------------------|------------|
| Samples               | Pathological changes |                                |            |
|                       | Hepatocyte edema     | Inflammatory cell infiltration | Congestion |
| PBS                   | +                    | -                              | -          |
| GAZY FC <sub>WT</sub> | ++                   | -                              | +++        |
| GAZY FC <sub>3A</sub> | ++                   | -                              | ++         |
| GAZY FC <sub>95</sub> | ++                   | -                              | +          |

| Spleen                 |                                |            |
|------------------------|--------------------------------|------------|
|                        | Pathological changes           |            |
| Samples                | Inflammatory cell infiltration | Congestion |
| PBS                    | +                              | -          |
| GAZY F <sub>C</sub> WT | ++                             | -          |
| GAZY F <sub>C</sub> 3A | +++                            | +          |
| GAZY F <sub>C</sub> 95 | ++                             | -          |

| Kidney                 |                                |                       |            |
|------------------------|--------------------------------|-----------------------|------------|
|                        | Pathological changes           |                       |            |
| Samples                | Inflammatory cell infiltration | Renal tubular atrophy | Congestion |
| PBS                    | -                              | -                     | -          |
| GAZY F <sub>C</sub> WT | +                              | -                     | -          |
| GAZY F <sub>C</sub> 3A | +                              | +                     | -          |
| GAZY F <sub>C</sub> 95 | -                              | -                     | -          |

**Table S4 Quantitative analysis of N-glycan species for Fc-engineered constructs.**

| Antibody variants      | Core fucose (%) | Terminal galactose (%) | High mannose (%) | Total sialic acid (%) |
|------------------------|-----------------|------------------------|------------------|-----------------------|
| Fc <sub>WT</sub>       | 85.47           | 20.36                  | 7.18             | 0.63                  |
| Fc <sub>3A</sub>       | 64.53           | 8.19                   | 15.52            | 0.28                  |
| Fc <sub>95</sub>       | 13.85           | 9.61                   | 81.2             | 0.69                  |
| Gazyva                 | 41.3            | 30.33                  | 4.75             | 0.7                   |
| MARV                   | 3.78            | 5.03                   | 3.48             | 0.35                  |
| Fc <sub>LZ01</sub>     |                 |                        |                  |                       |
| Fc <sub>3A+S239D</sub> | 77.13           | 10.48                  | 10.58            | 0.35                  |
| Fc <sub>3A+F243L</sub> | 18.52           | 10.66                  | 75.11            | 0.87                  |
| Fc <sub>3A+R292A</sub> | 39.2            | 11.64                  | 49.43            | 0.56                  |
| Fc <sub>3A+Y300L</sub> | 70.4            | 8.73                   | 17.18            | 0.37                  |

**Note on Fc variants:** Fc<sub>WT</sub> and Fc<sub>3A</sub> are fully fucosylated IgG1 (produced in standard CHO-S cells). Gazyva and MARV Fc<sub>LZ01</sub> serve as afucosylated benchmarks (produced in FUT8-KO CHO-S cells). Fc<sub>95</sub> is a sequence-engineered variant with an intrinsically low-fucose profile (~13.85%).
