# Supplementary material
Source: Research Square preprint supplement (doi:10.21203/rs.3.rs-9897374/v1)
Supplement: Supplementary file 3 [file c5e5cb2d82548f6b4870c83b.docx]

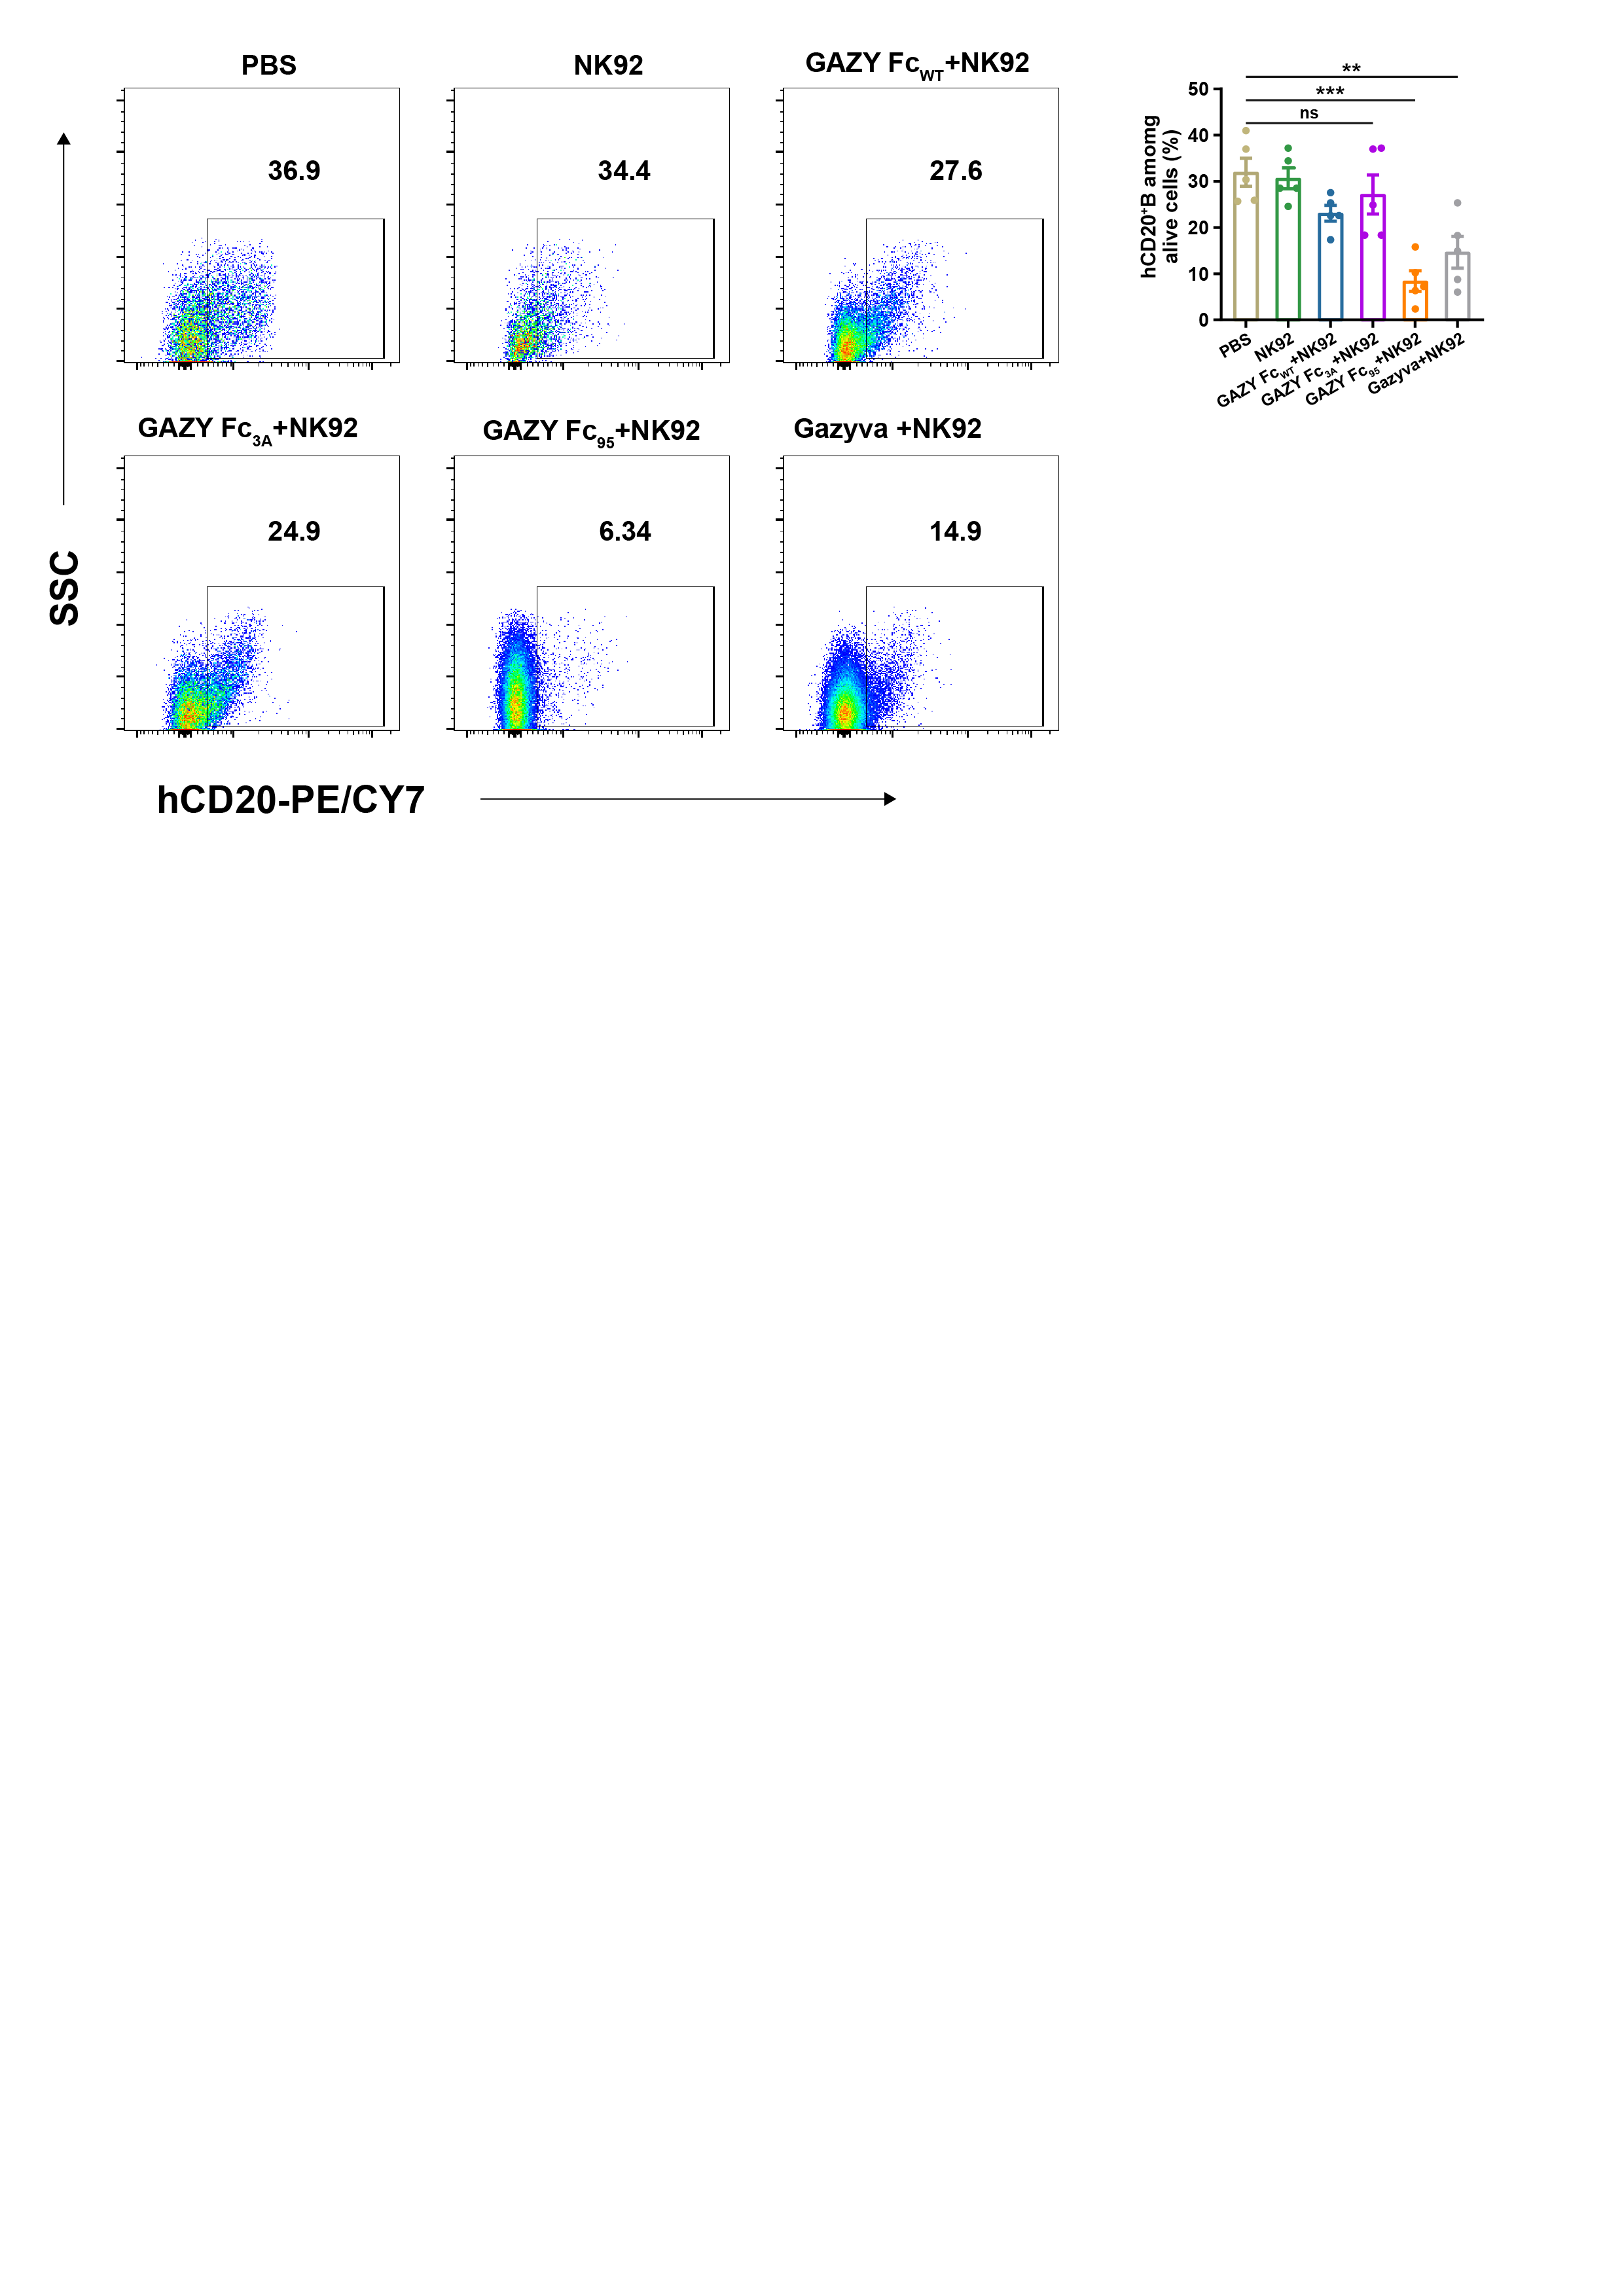


**Extended data figure 1. Representative flow cytometry plots for human CD20+ B Raji cell profiling in the prropheral blood of mice corresponding to Figure 6C.**

Groups include those treated with PBS, NK92, GAZY FcWT+NK92, GAZY Fc3A+NK92, GAZY Fc95+NK92 and Gazyva+NK92 . Data show the depletion of Raji cells (hCD20+) within the prropheral blood.


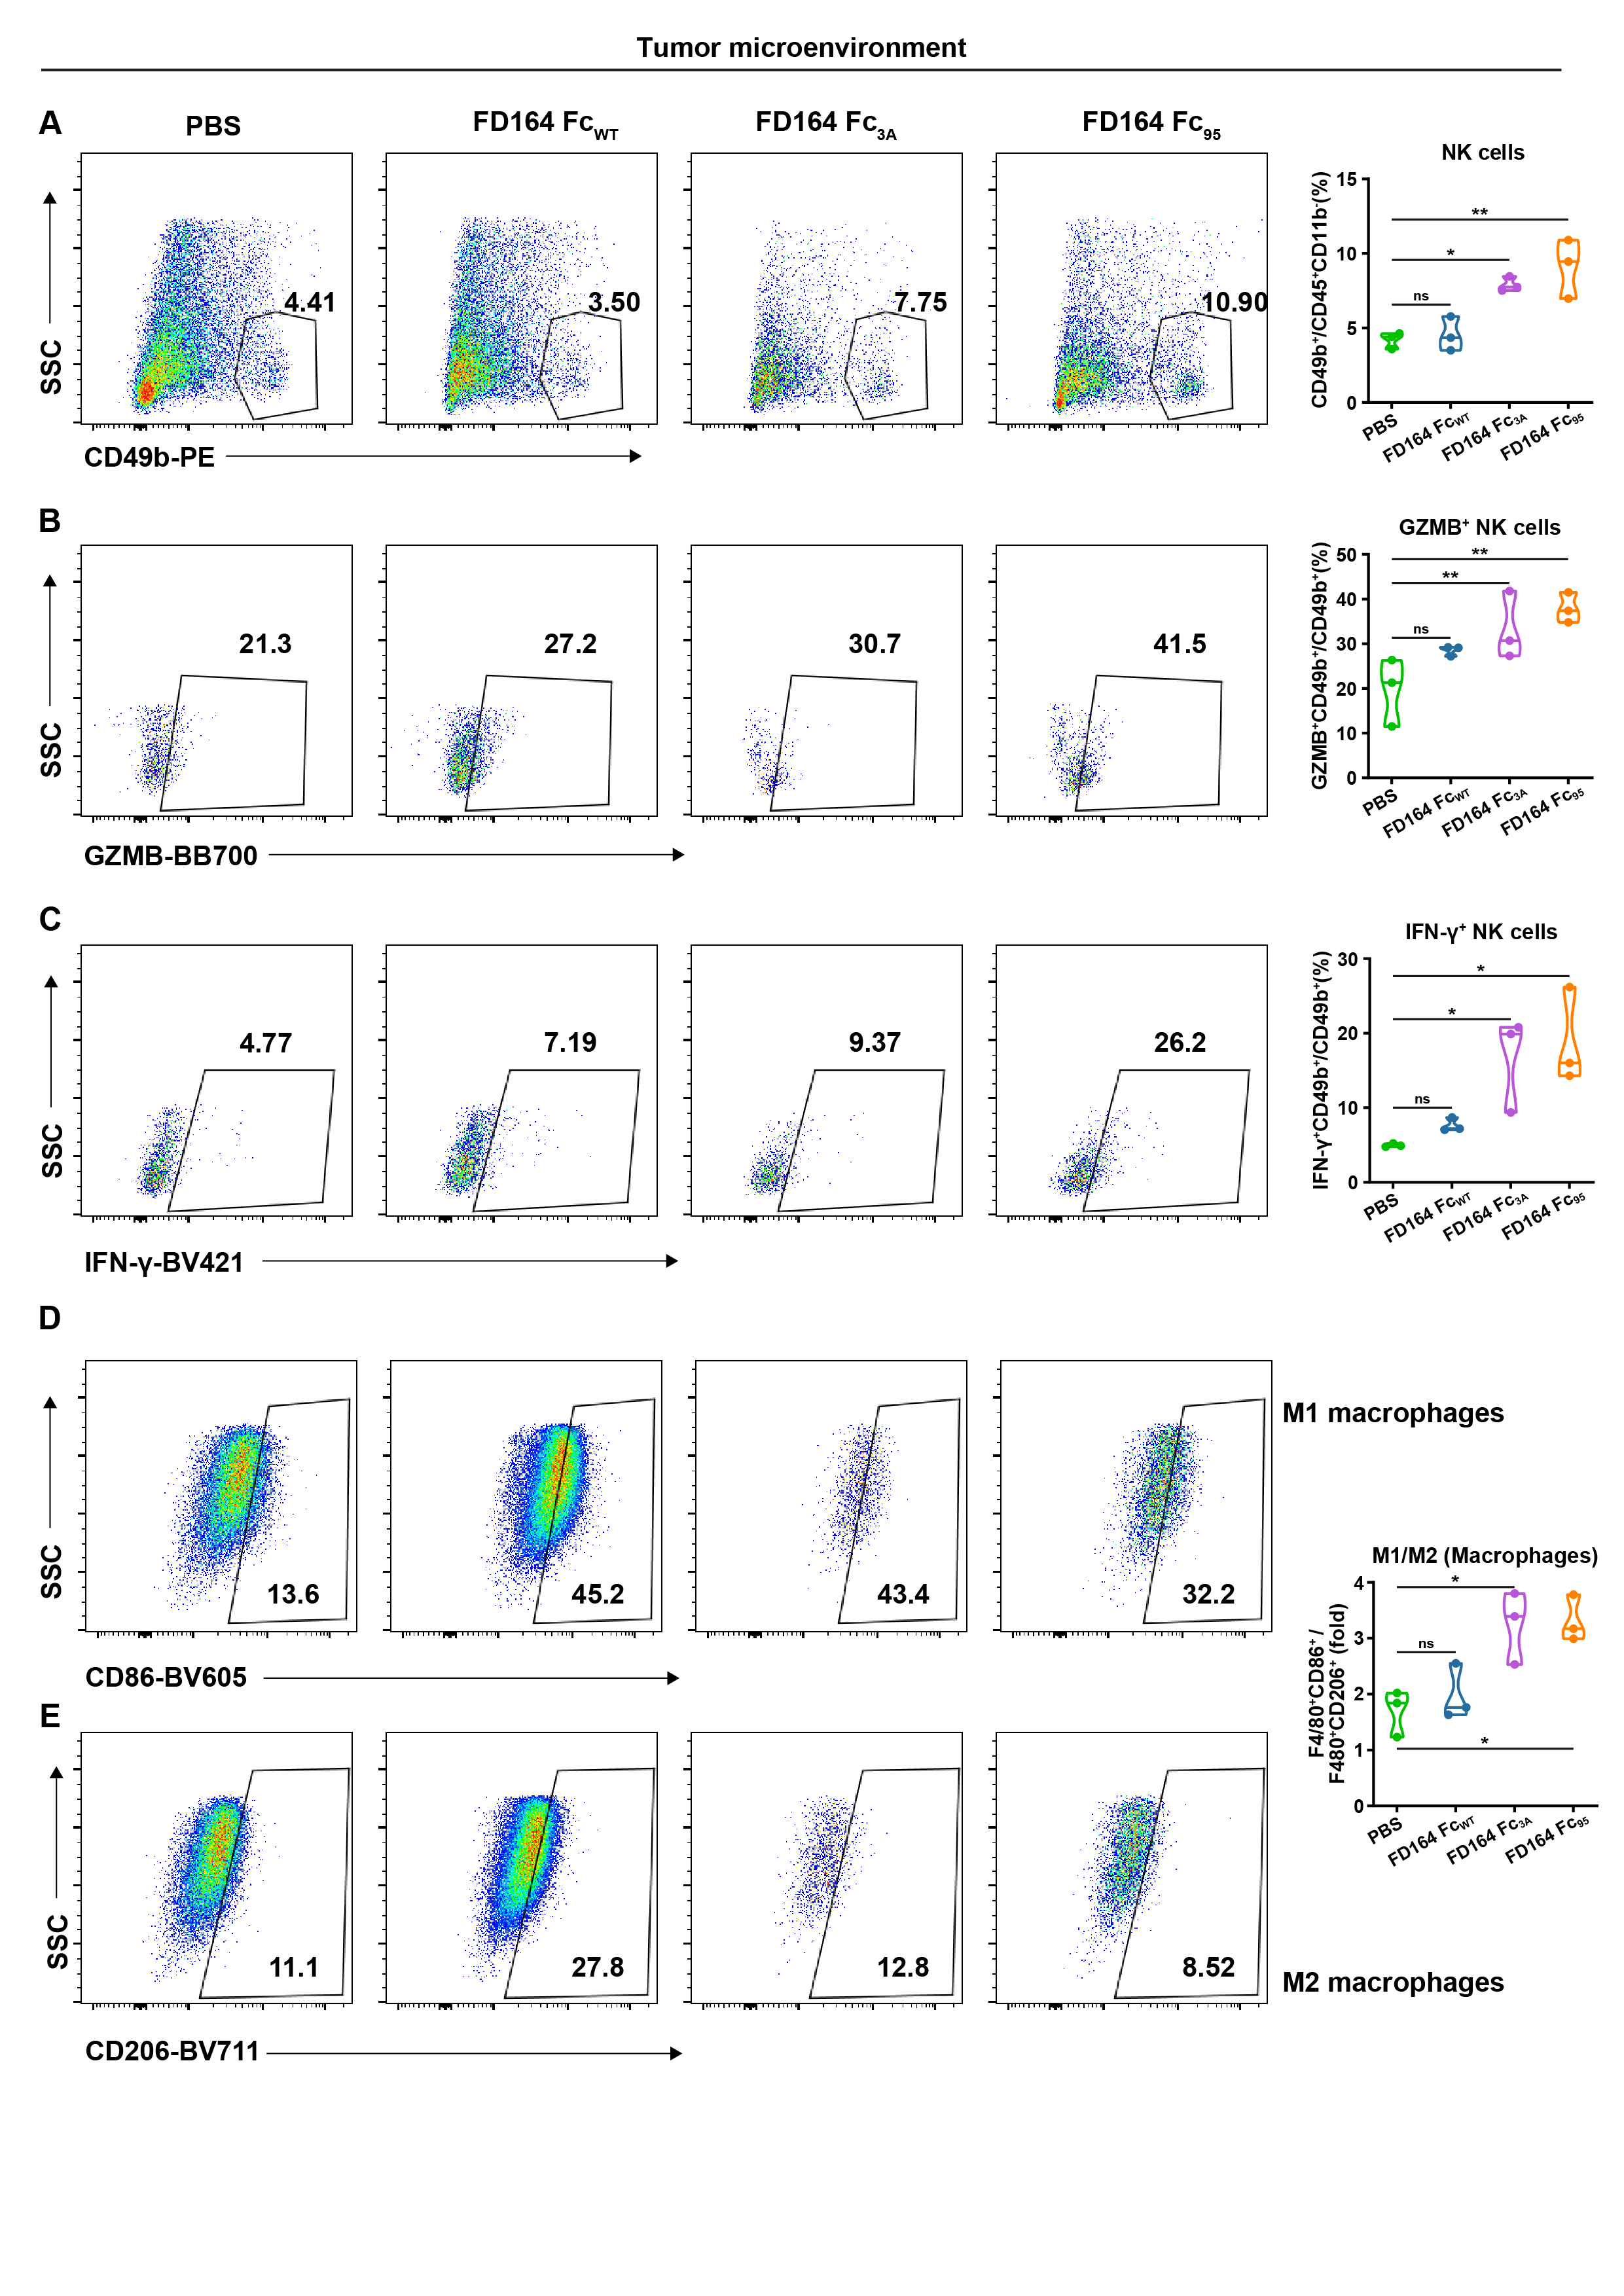


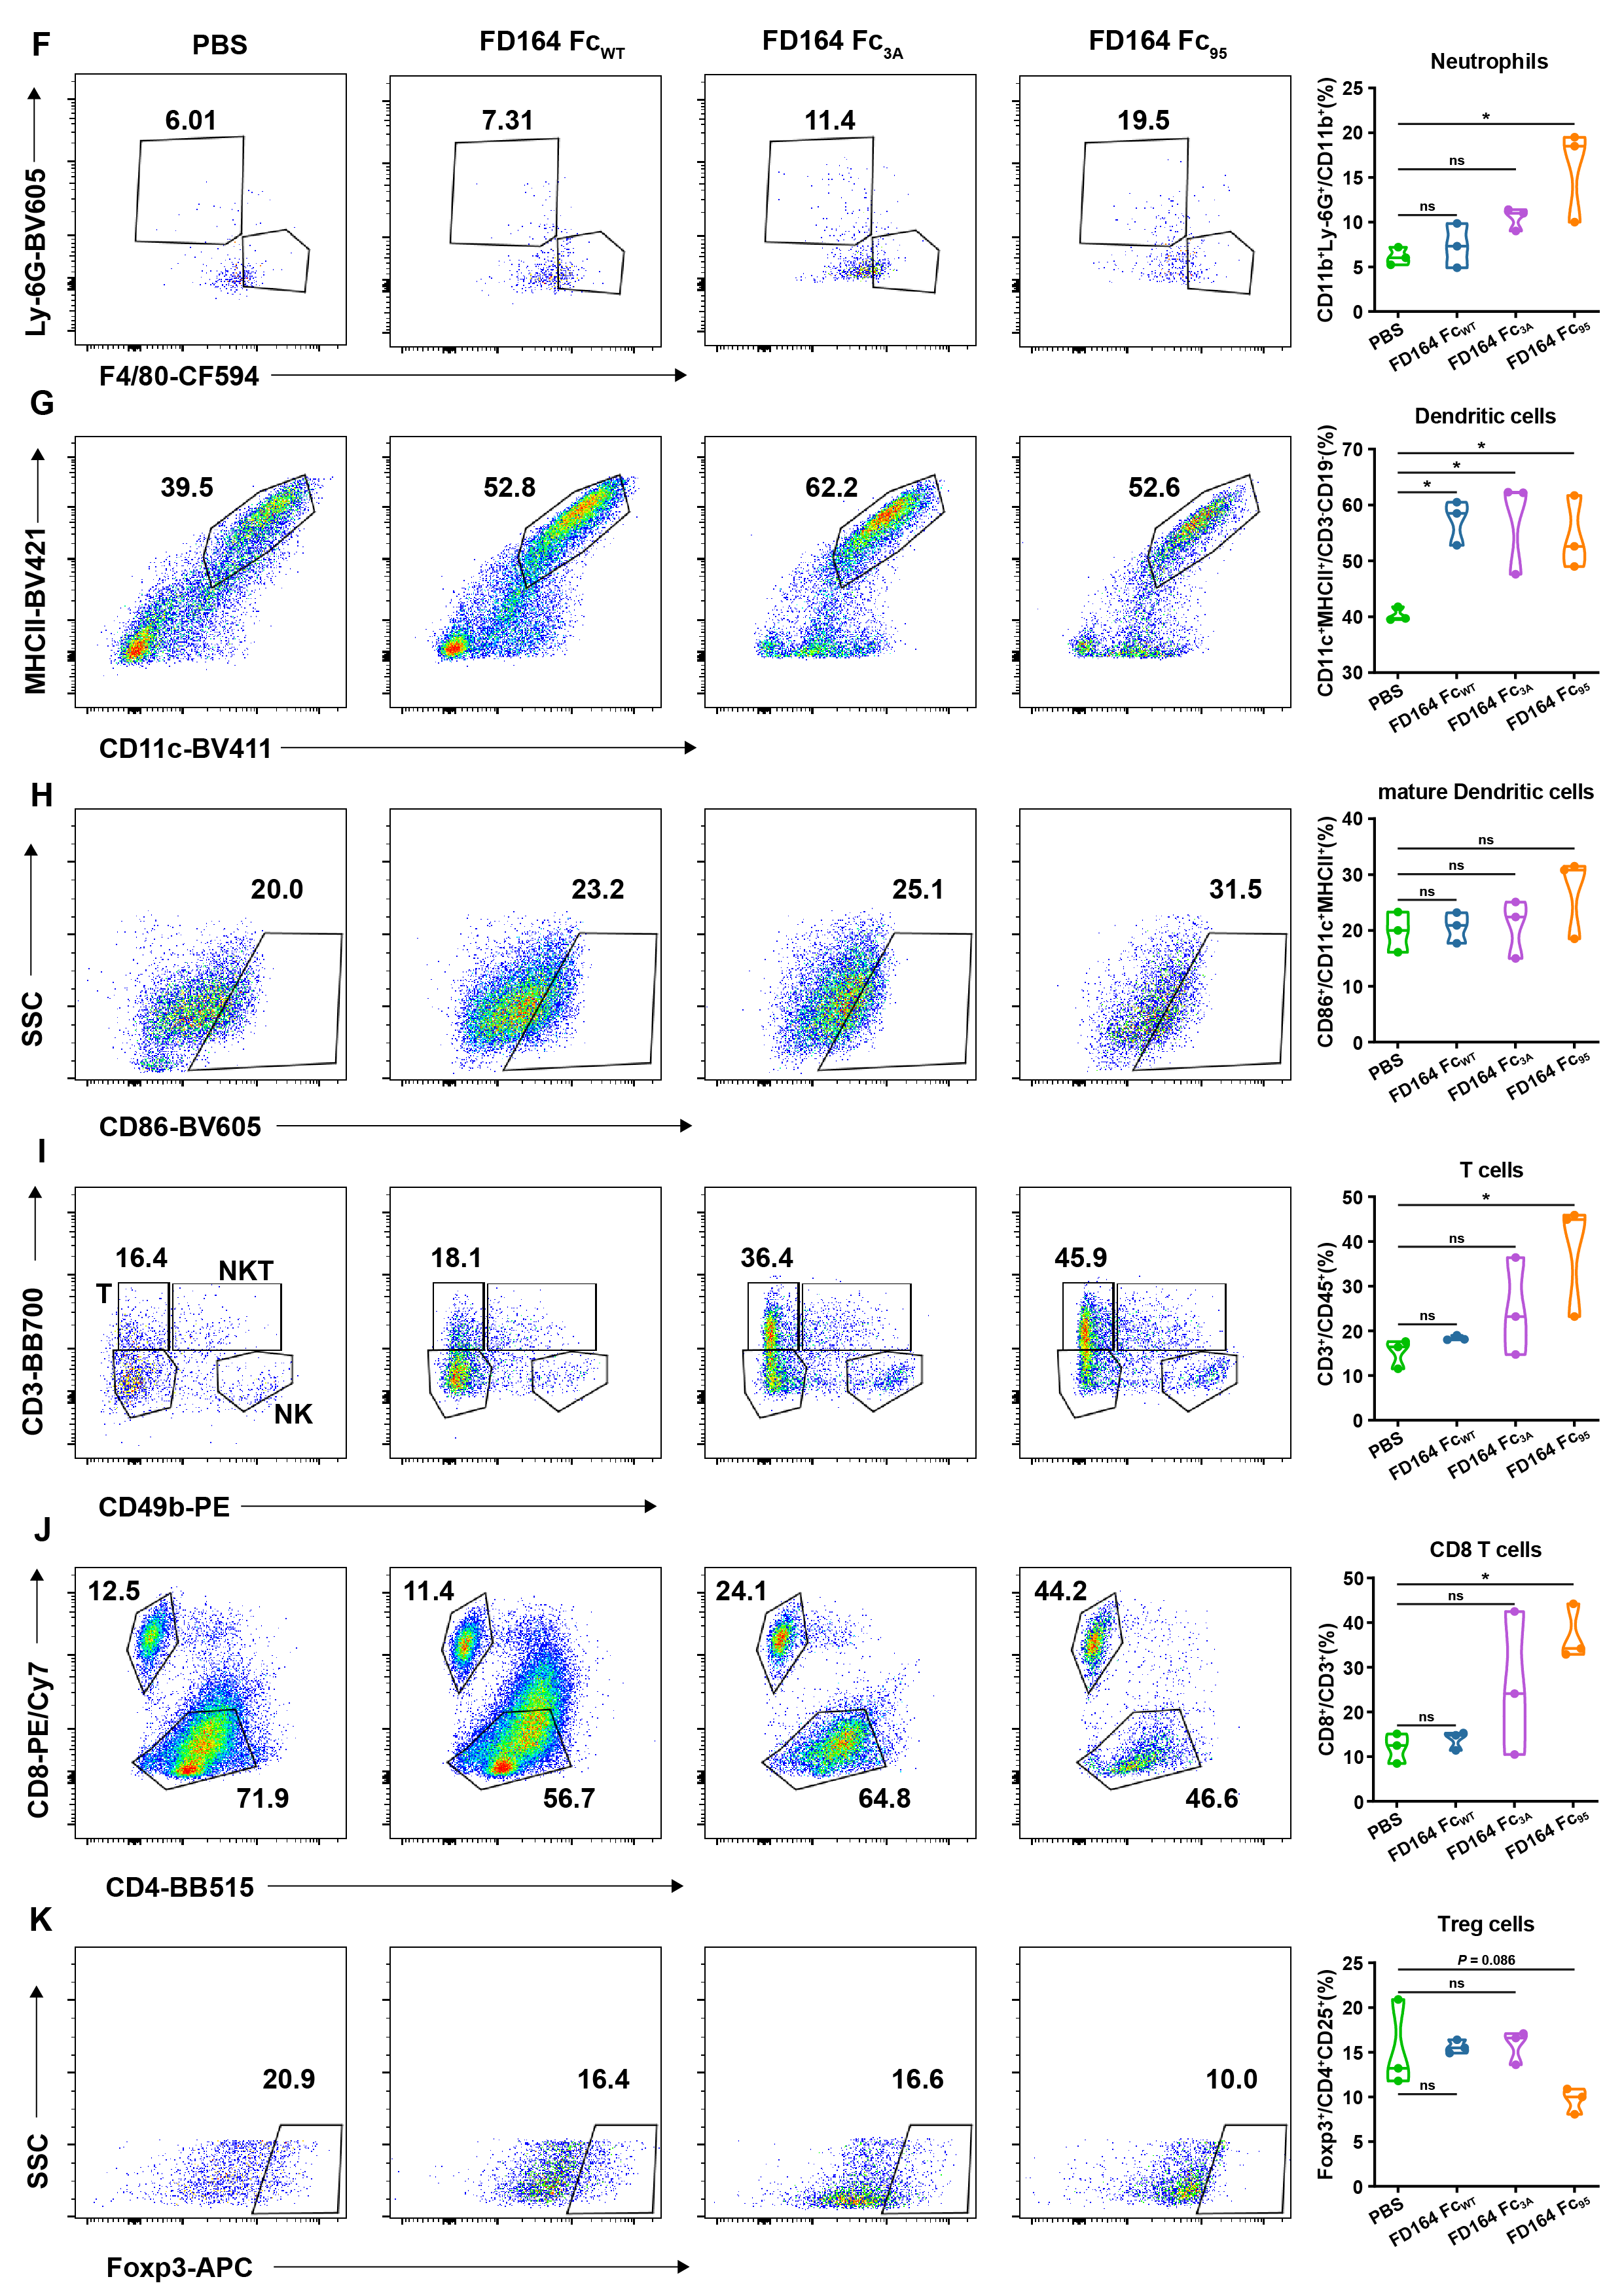


**Extended data figure 2. Representative flow cytometry plots for immune cell profiling in the TME corresponding to Figure 7F.**

Representative flow cytometry plots for NK cells (**A**), GAZM+NK cells (**B**), IFN-γ+NK cells (**C**), M1 macrophages (**D**), M2 macrophages (**E**), Neutrophils (**F**), Dendritic cells (**G**), Mature Dendritic cells (**H**), T cells (**I**), CD8 T cells (**J**), Treg cells (**K**) within the tumor microenvironment (TME).


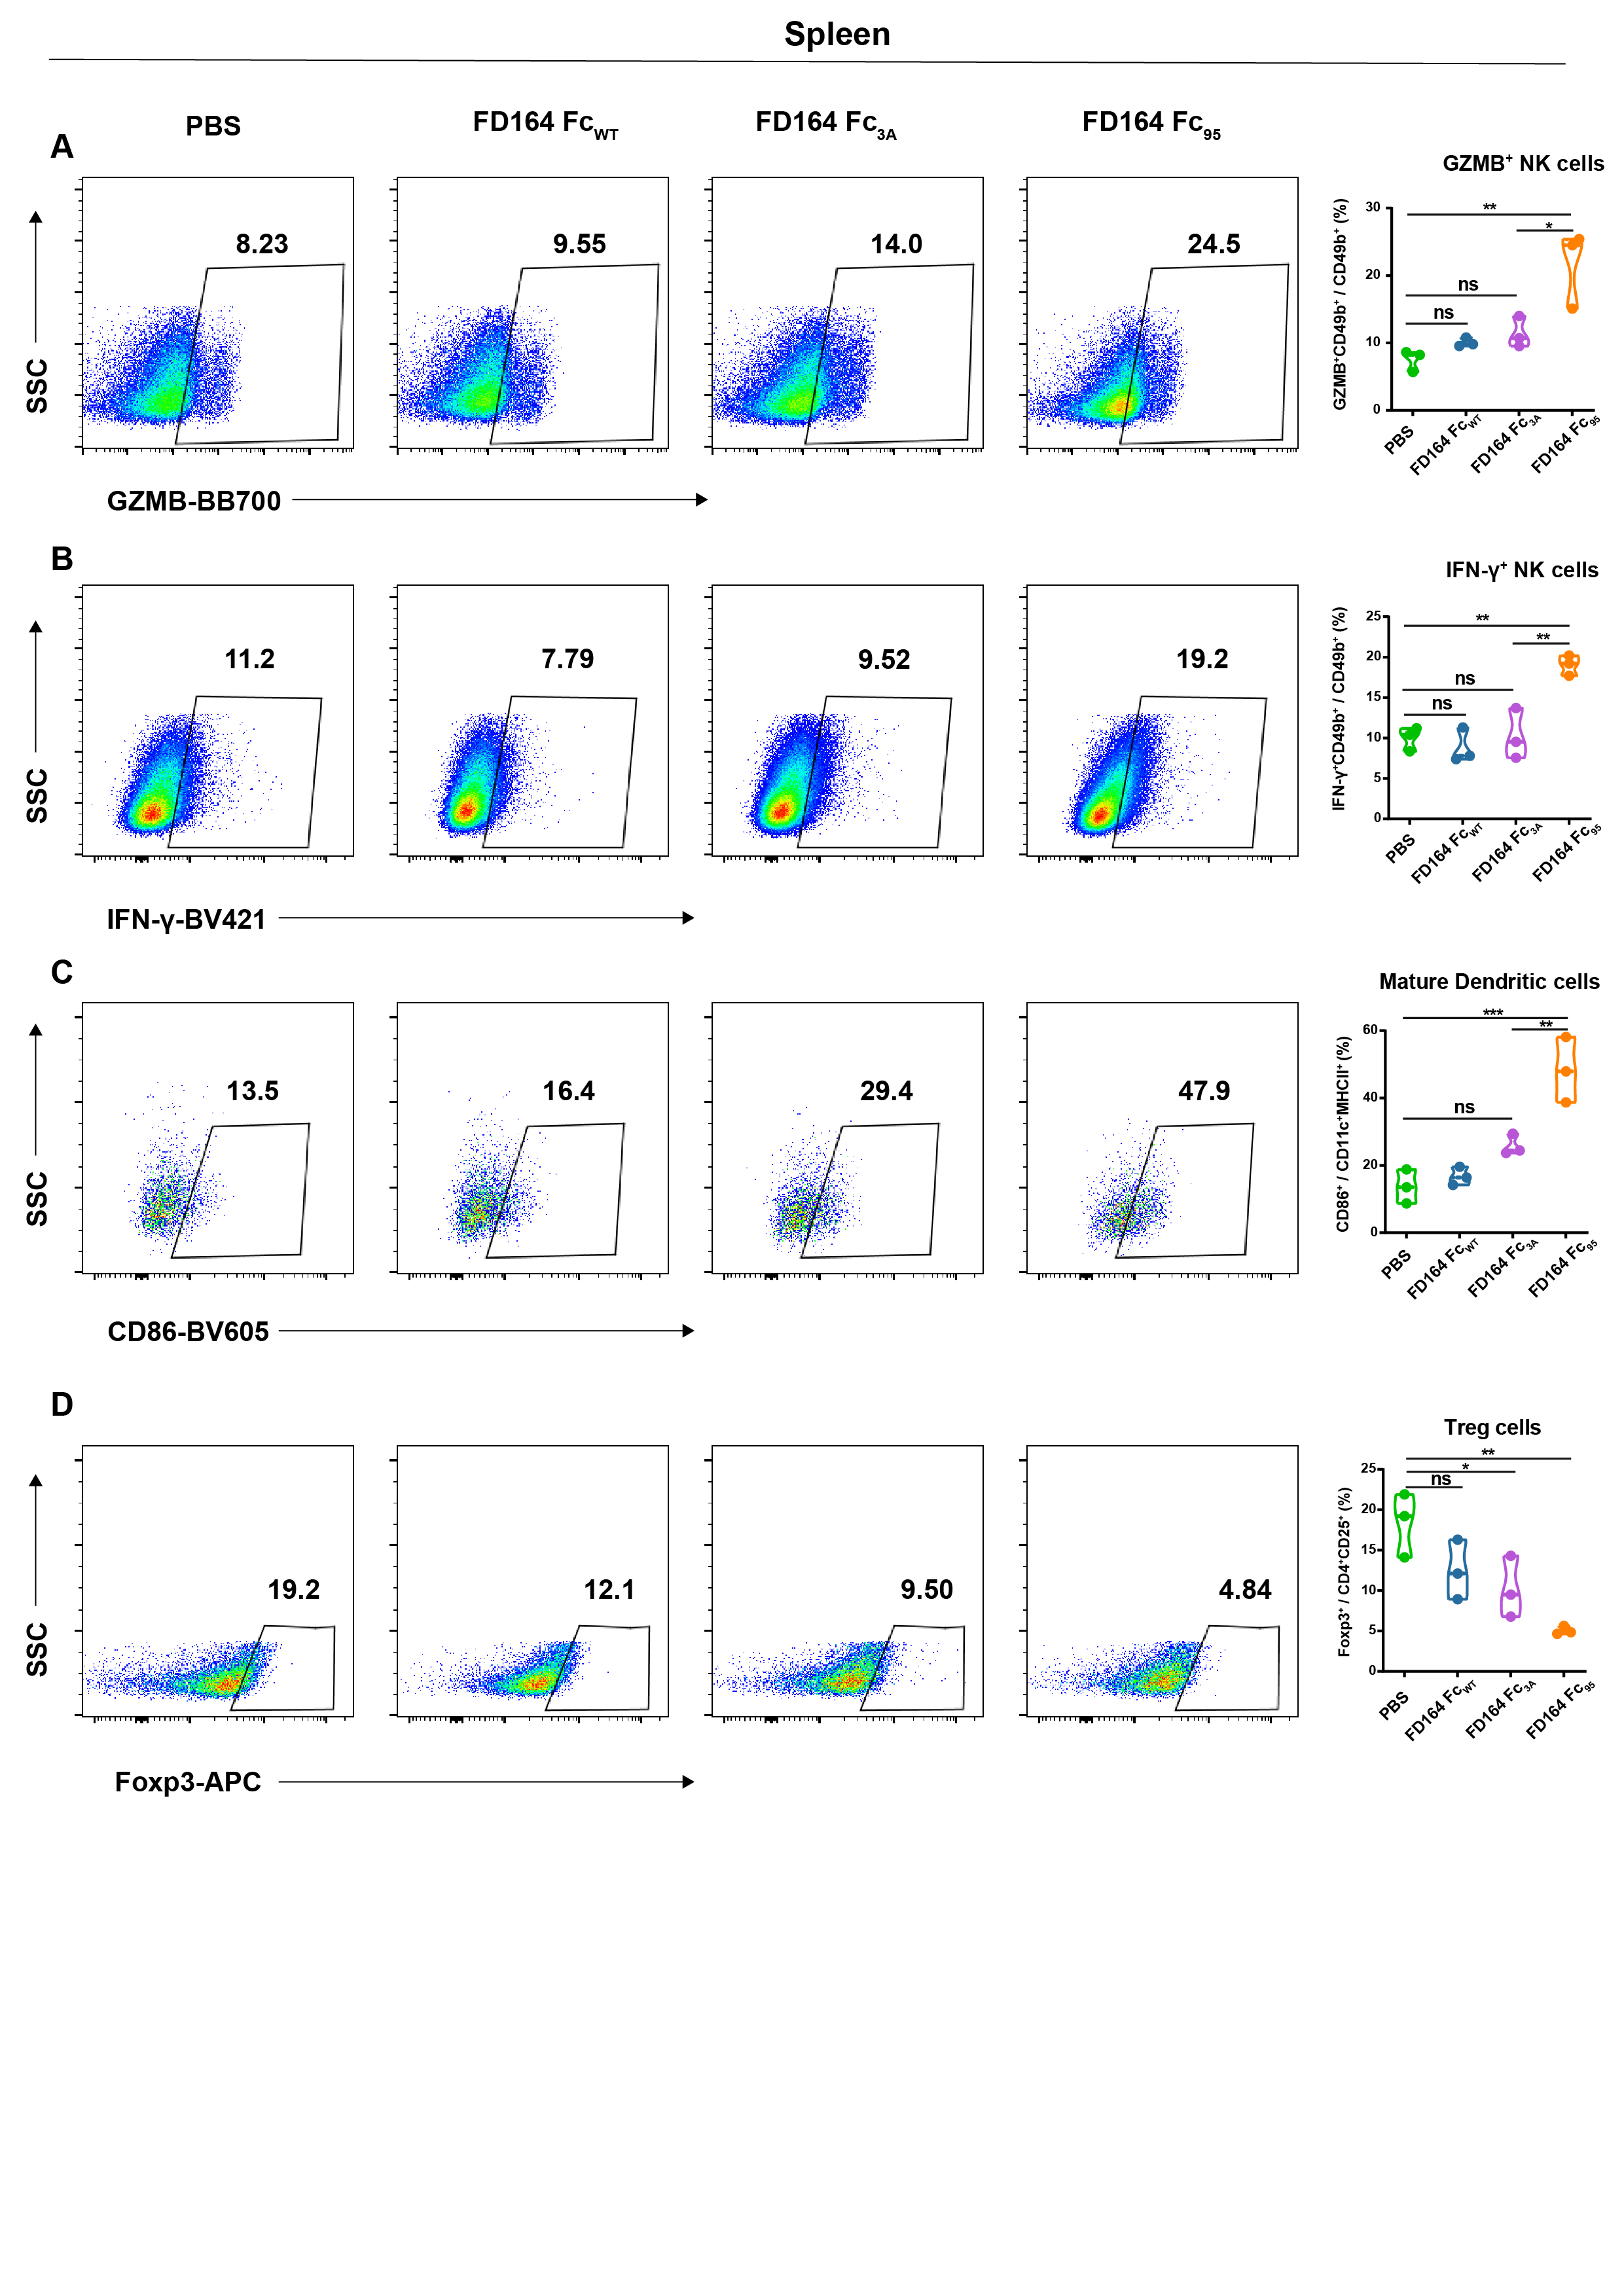


**Extended data figure 3. Representative flow cytometry plots for immune cell profiling in the spleen corresponding to Figure S7O.**

Representative flow cytometry plots for GAZM+NK cells (**A**), IFN-γ+NK cells (**B**), Mature Dendritic cells (**C**), Treg cells (**D**) in spleen. Non-significant groups are not shown.


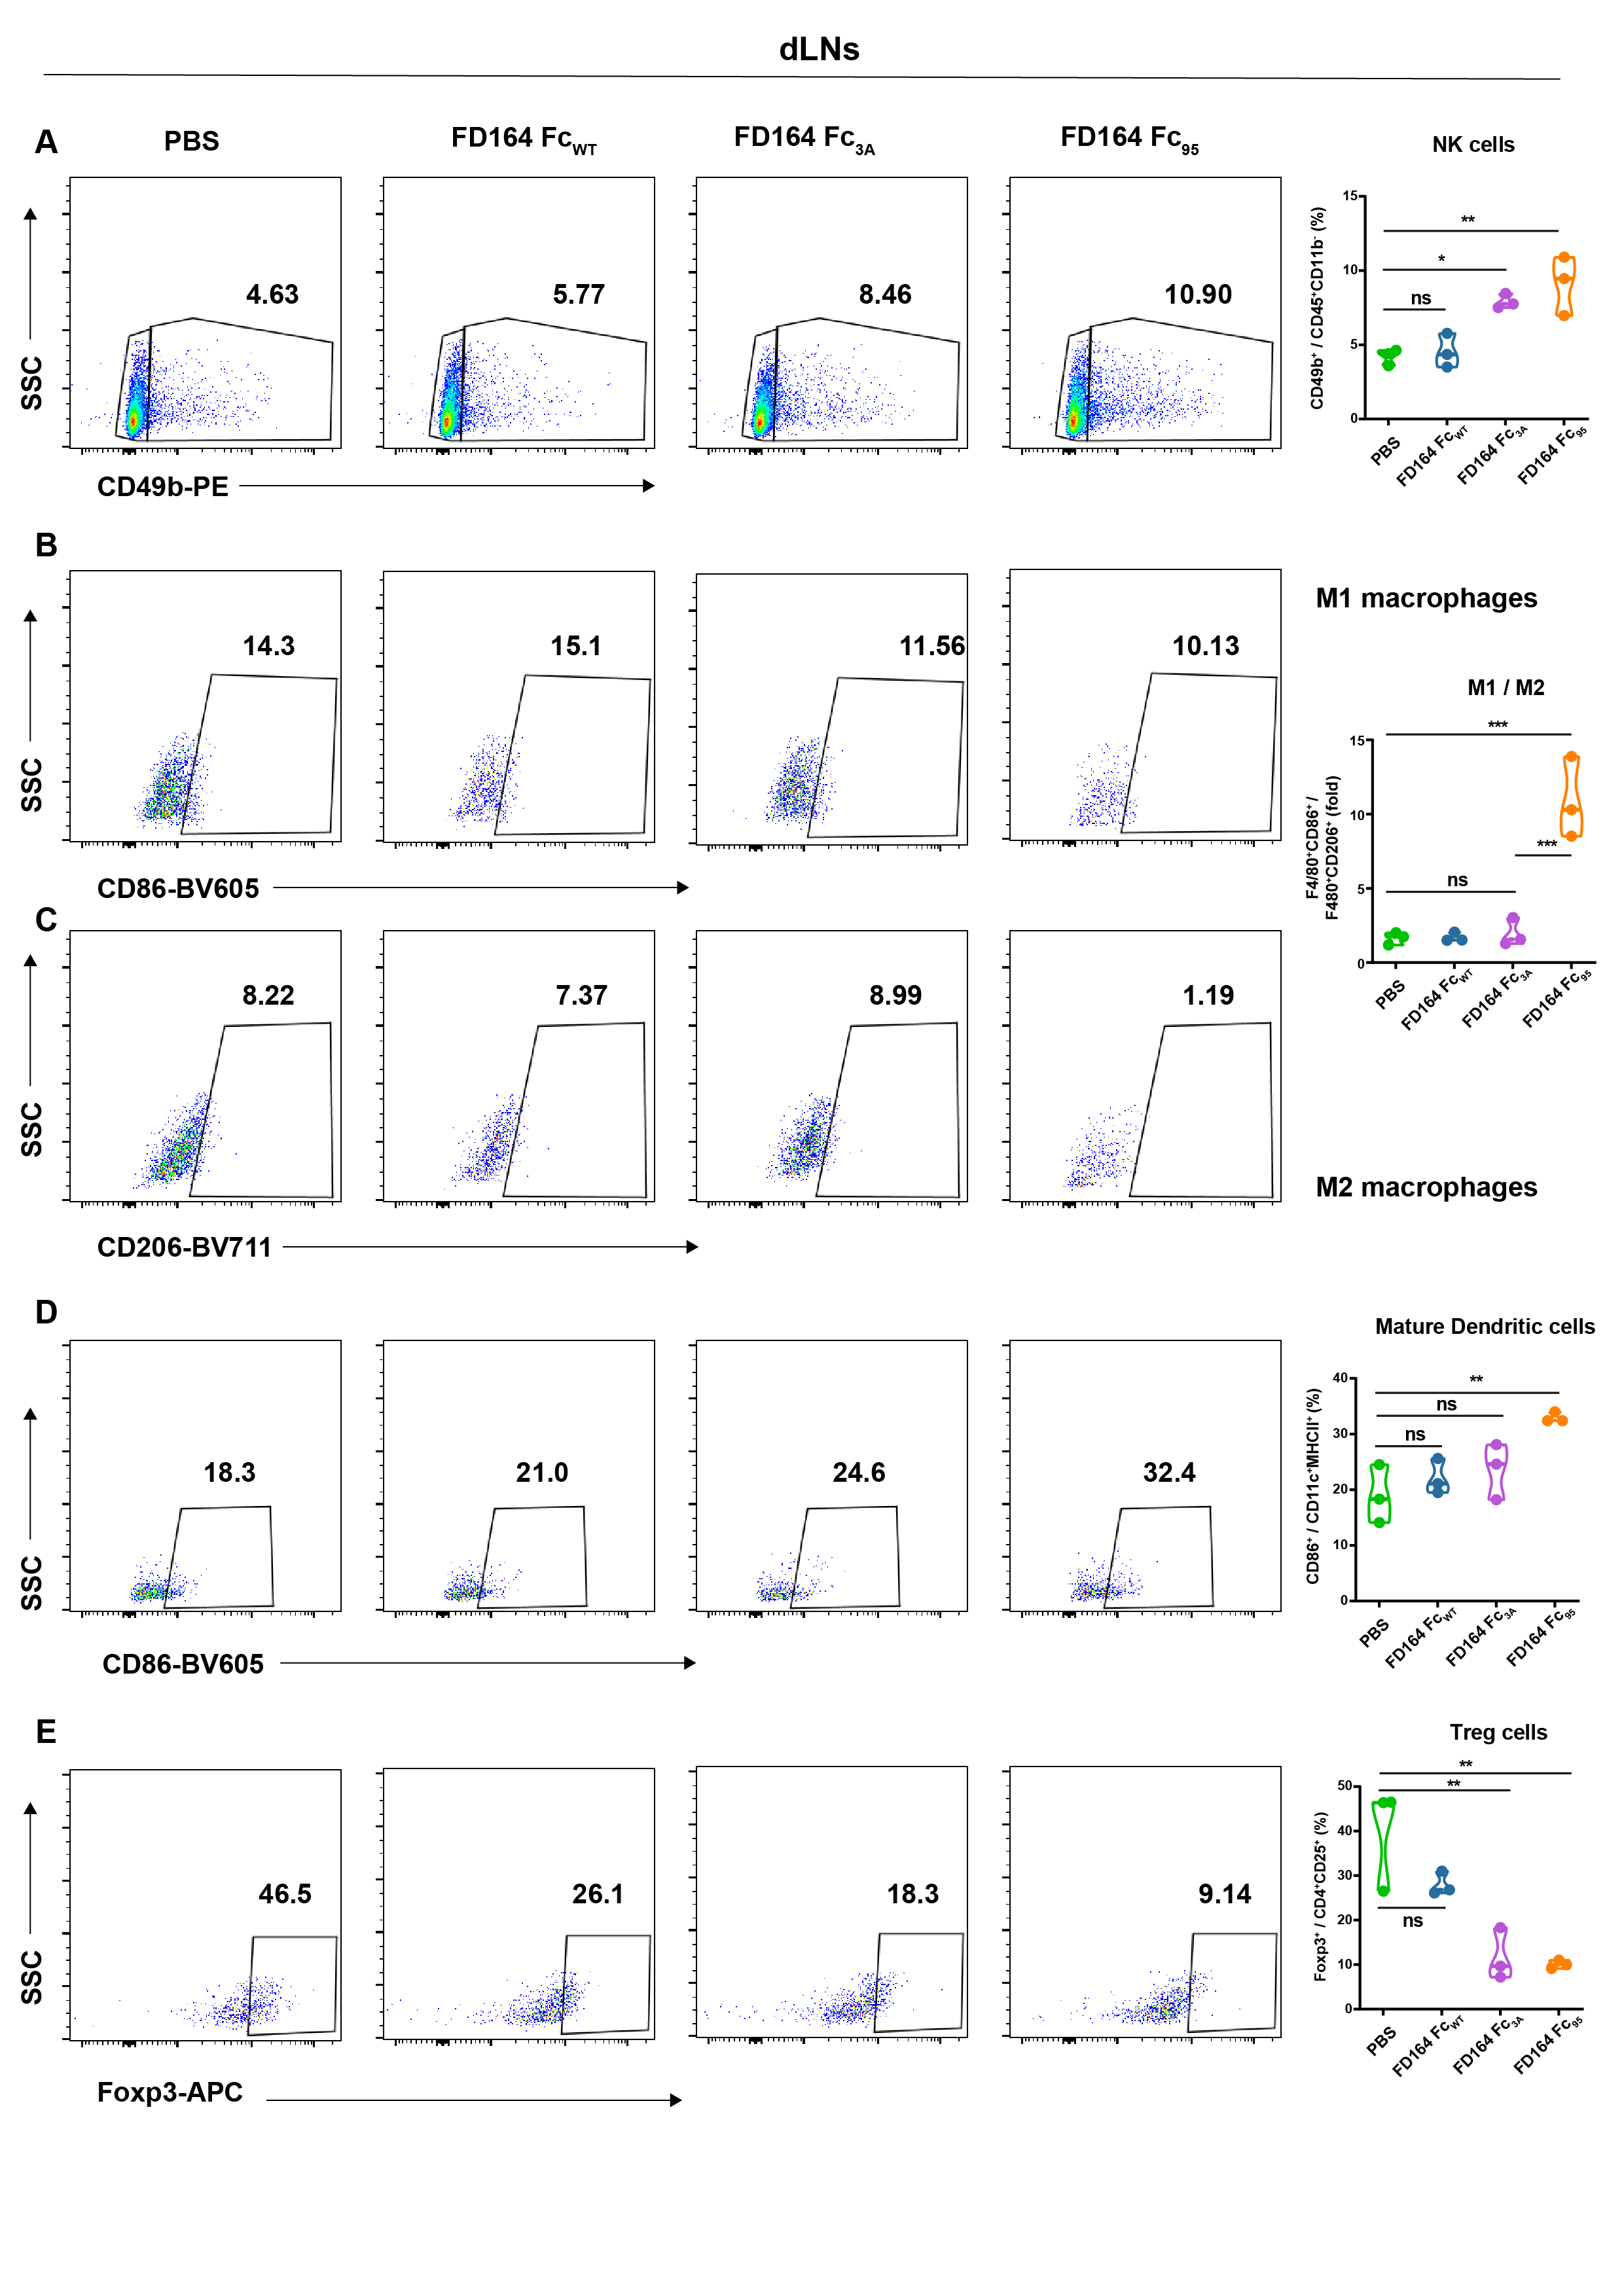


**Extended data figure 4. Representative flow cytometry plots for immune cell profiling in the spleen corresponding to Figure S7P.**

Representative flow cytometry plots for NK cells (**A**), M1 macrophages (**B**), M2 macrophages (**C**), Mature Dendritic cells (**D**), Treg cells (**E**) in dLNs. Non-significant groups are not shown.
